# Supplementary material
Source: Royal Society of Chemistry journal article supplement (https://www.rsc.org/suppdata/dt/1999/683/809481k.doc)
Supplement: Supplementary file 1 [file 809481k.doc]

**SUPPLEMENTARY DATA**

Manuscript Title: Second-Sphere Anion Interactions with (Polypyridyl)ruthenium Complexes, and Their Importance in the Cation-Exchange Chromatographic Separation of Stereoisomers of Dinuclear Species

Authors: Nicholas C. Fletcher and F. Richard Keene*

**Supplementary Figure S1.** 1H NMR titration curves plotted for the sequential addition of sodium 4-toluate to (a) *meso*-[{(Me2bpy)2Ru}2(‑bpm)]Cl4 (b) *rac‑*[{(Me2bpy)2Ru}2(-bpm)]Cl4 [Me2bpy-H6’ (), Me2bpy-H3 () and bpm-H3/5 ()]

**Supplementary Figure S2.** 1H NMR titration curves plotted for the sequential addition of [Ru(Me2bpy)3]Cl2 to sodium toluene-4-sulfonate [H-Me (), H2/6 () and H3/5 ()].

**Supplementary Figure S3.** The relative 1H NMR signal perturbations observed on the protons: H3, H-Me, H5 and H6 respectively with [Ru(Me2bpy)3]Cl2 on the addition of 5 equivalents of the organic anions.

**Supplementary Figure S4.** The relative photoemission of the complex [Ru(Me2bpy)3]Cl2 upon the addition of organic sodium salts of organic anions octanoate (), 4-toluate (), 4‑*t*butylbenzoate (), and 4‑trifluoromethylbenzoate () {1 x 10-4 mol dm-3}.

**Supplementary Figure S1**

**Supplementary Figure S2**

**Supplementary Figure S3**

**Supplementary Figure S4**
